# Supplementary material
Source: publisher figshare collection journal article supplement (https://acs.figshare.com/ndownloader/files/24722819)
Supplement: Supplementary file 1 [file 24722819]

**Supporting information of**

# Study of aqueous Am(III)-aliphatic dicarboxylate complexes: Coordination mode-dependent optical property and stability changes

*Hee-Kyung Kim,<sup>1\*‡</sup> Keunhong Jeong,<sup>2‡</sup> Hye-Ryun Cho,<sup>1</sup> Kyungwon Kwak,<sup>3,4\*</sup> Euo*

*Chang Jung,<sup>1</sup> Wansik Cha<sup>1</sup>*

<sup>1</sup> Nuclear Chemistry Research Team, Korea Atomic Energy Research Institute,

Daejeon 34057, Republic of Korea

<sup>2</sup> Department of Chemistry, Korea Military Academy, Seoul 01805, Republic of Korea

<sup>3</sup> Center for Molecular Spectroscopy and Dynamics, Institute for Basic Science (IBS),

Korea University, Seoul 02841, Korea.

<sup>4</sup> Department of Chemistry, Korea University, Seoul 02841, Republic of Korea

**Corresponding Authors**

\*Hee-Kyung Kim (hkim11@kaeri.re.kr), \*Kyungwon Kwak (kkwak@korea.ac.kr)

## Author Contributions

The manuscript was written through contributions of all authors. All authors have given approval to the final version of the manuscript. ‡These authors contributed equally.

Table S1. pKa values of the examined carboxylic ligands

| Ligands | I = 0.1 m <sup>a</sup> |                  | I = 1.05 m        |                   |
|---------|------------------------|------------------|-------------------|-------------------|
|         | pK <sub>a1</sub>       | pK <sub>a2</sub> | pK <sub>a1</sub>  | pK <sub>a2</sub>  |
| Mal     | 2.65                   | 5.27             | 2.49 <sup>b</sup> | 5.00 <sup>b</sup> |
| Suc     | 3.99                   | 5.24             | 3.95 <sup>b</sup> | 4.88 <sup>b</sup> |
| Glu     | 4.19                   | 5.06             |                   |                   |
| Adi     | 4.26                   | 5.04             |                   |                   |
| Mala    |                        |                  | 3.15 <sup>c</sup> | 4.45 <sup>c</sup> |
| Ac      |                        |                  | 4.58 <sup>a</sup> |                   |

<sup>a</sup>Taken from NIST database.<sup>1</sup>

<sup>b</sup>Calculated using SIT from the reported values under I = 0 conditions by Gane, R.; Ingold, C. K.<sup>2</sup>

<sup>c</sup>Reported under = 1.05 m NaCl at 25°C.<sup>3</sup>

Table S2. Binary ion interaction coefficients ( $\epsilon(i,j)$ ) used in this study

| Binary ion interaction coefficients                   |                  | Ref. <sup>4-6</sup> |
|-------------------------------------------------------|------------------|---------------------|
| $\epsilon(\text{H}^+, \text{ClO}_4^-)$                | $0.14 \pm 0.02$  | 4                   |
| $\epsilon(\text{Am}^{3+}, \text{ClO}_4^-)$            | $0.49 \pm 0.03$  | 4                   |
| $\epsilon(\text{Am}(\text{Ox})^+, \text{ClO}_4^-)$    | $0.08 \pm 0.05$  | 4                   |
| $\epsilon(\text{Na}^+, \text{Am}(\text{Ox})_2^-)$     | $-0.21 \pm 0.08$ | 4                   |
| $\epsilon(\text{Cm}(\text{Ac})^{2+}, \text{ClO}_4^-)$ | $0.42 \pm 0.05$  | 5                   |
| $\epsilon(\text{Na}^+, \text{OH}^-)$                  | $0.04 \pm 0.01$  | 4                   |

|                                           |                  |   |
|-------------------------------------------|------------------|---|
| $\epsilon(\text{Na}^+, \text{HOx}^-)$     | $-0.07 \pm 0.01$ | 4 |
| $\epsilon(\text{Na}^+, \text{Ox}^{2-})$   | $-0.08 \pm 0.01$ | 4 |
| $\epsilon(\text{Na}^+, \text{HSucc}^-)$   | 0.02             | 6 |
| $\epsilon(\text{Na}^+, \text{Succ}^{2-})$ | 0.09             | 6 |

Table S3. NLMO bond order for Am-O<sub>lig</sub> and Am-O<sub>aqua</sub>.

| Species                                            | Binding mode               | Bond order<br>Am-O <sub>lig</sub> | Bond order<br>Am-O <sub>aqua</sub> |
|----------------------------------------------------|----------------------------|-----------------------------------|------------------------------------|
| Ox 1:1                                             | side-on<br>5-membered ring | 0.0549                            | 0.0154                             |
|                                                    |                            | 0.0509                            | 0.0079                             |
|                                                    |                            | 0.0508                            | 0.0010                             |
| Mal 1:1                                            | side-on<br>6-membered ring | 0.0502                            | 0.0163                             |
|                                                    |                            | 0.0548                            | 0.0115                             |
| Suc 1:1                                            | end-on<br>4-membered ring  | 0.0490                            | 0.0195                             |
| Glu 1:1                                            |                            | 0.0434                            | 0.0196                             |
| Adi 1:1                                            |                            | 0.0429                            | 0.0194                             |
| Ac 1:1                                             |                            | 0.0375                            | 0.0190                             |
| [Am(H <sub>2</sub> O) <sub>9</sub> ] <sup>3+</sup> |                            | -                                 | 0.0297                             |

The NLMO bond order for Am-O<sub>lig</sub> indicates the calculated bonding order without considering anti-bond. The bond order data of Am-O<sub>aquo</sub> shows the bonding strength between Am and oxygen in water, which confirms that the bonding become weaker (decreased bonding order induced by dicarboxylates) after binding with dicarboxylates. In general, its bonding order (Am-O<sub>aquo</sub>) decreases more for the side-on chelating structures than for the end-on chelating structures, which confirms tighter binding by side-on oriented ligands.

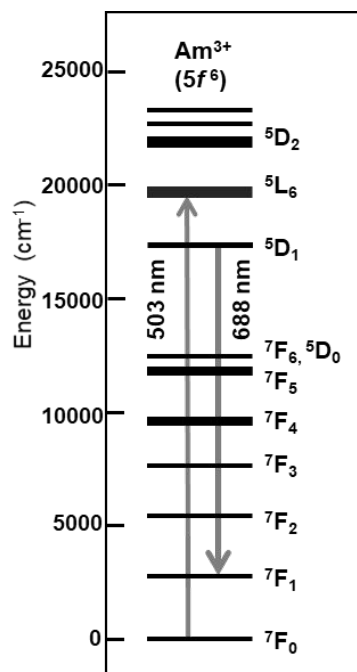

Figure S1. Electronic energy states of  $\text{Am}^{3+}$  ( $5f^6$ ). The arrows indicate major electronic transitions.<sup>7-9</sup> Due to the strong spin-orbit couplings of Am(III), only  $J$  remains as a good quantum number for these energy levels.

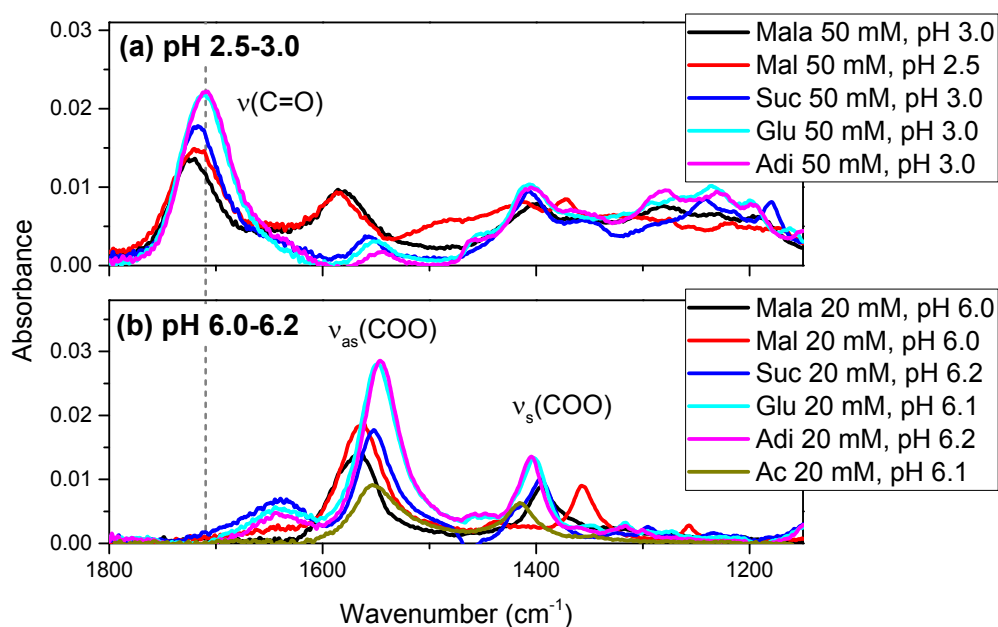

Figure S2. ATR-FTIR spectra of carboxylic ligands under (a) pH 2.5–3.0 and (b) pH 6.0–6.2. At pH above 6, the C=O stretching band ( $1710\text{--}1720\text{ cm}^{-1}$ ) disappeared and strong asymmetric ( $v_{\text{as}}(\text{COO})$   $1540\text{--}1570\text{ cm}^{-1}$ ) and symmetric ( $v_{\text{s}}(\text{COO})$   $1350\text{--}1420\text{ cm}^{-1}$ ) stretching bands appeared. These data indicate that all the carboxyl groups were deprotonated under pH  $\sim 6$  conditions.

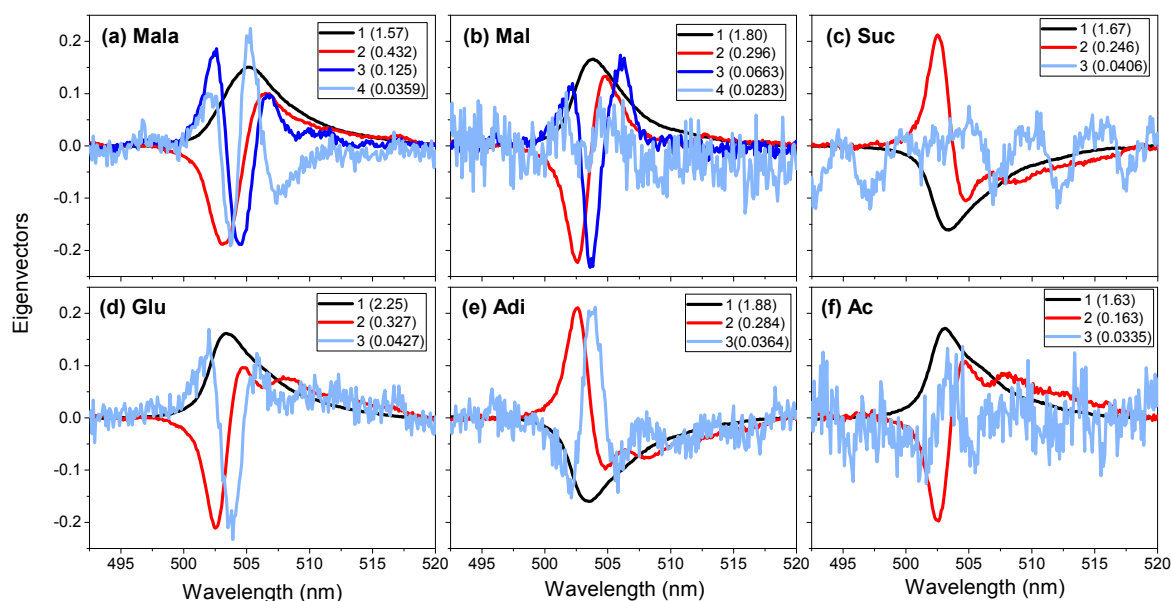

Figure S3. Eigenvector plots obtained from the factor analysis of the absorption spectra using HypSpec program. The relatively noisy eigenvector plots (in blue) are indicative of non-absorbing species. The results of the factor analysis suggest that there are three absorbing species ( $\text{Am}^{3+}$ , 1:1, and 1:2 complexes) for Mal and Mala, and two absorbing species ( $\text{Am}^{3+}$  and 1:1 complexes) for Suc, Glu, Adi, and Ac under our experimental conditions.

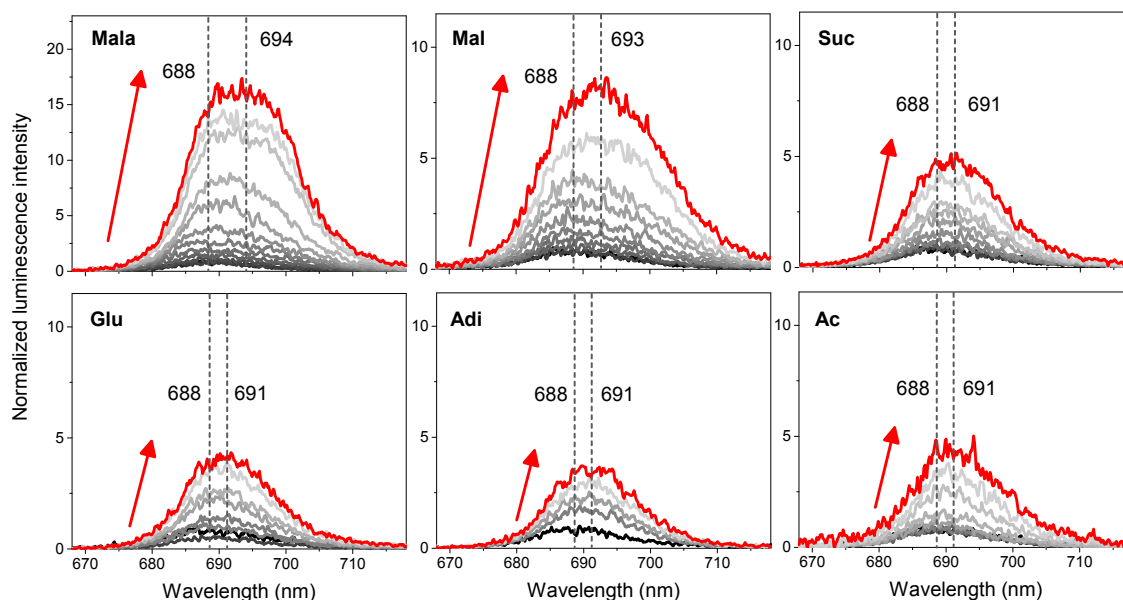

Figure S4. Luminescence spectra measured as a function of ligand concentrations. The samples are the same series as that in Fig. 2. Note that the intensity scale for Mala is twice that of the others. Each spectrum was obtained by accumulating the luminescence signals from 500 laser pulses. The ICCD gate opening was delayed by 15 ns after a laser pulse with a width of 500 ns. The luminescence intensities are normalized to the maximum peak intensity of  $1 \mu\text{M Am}^{3+}$ .

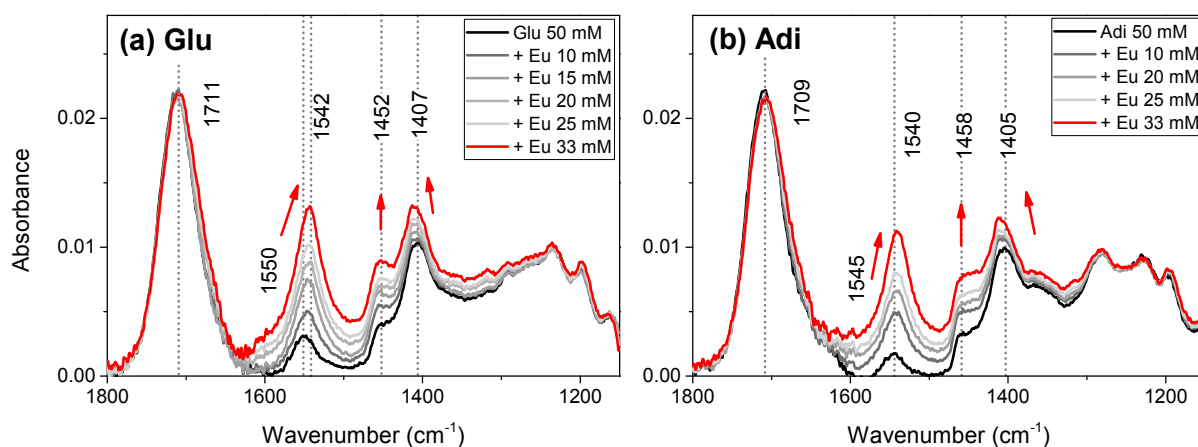

Figure S5. IR spectra of (a) Glu and (b) Adi with increase in Eu concentration under pH 3.

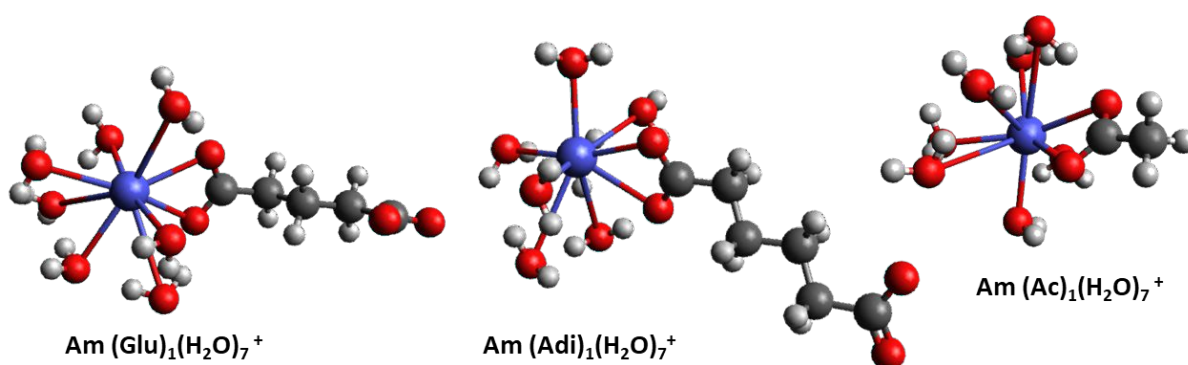

Figure S6. DFT-calculated structures of Am(III)-Glu, Adi, and Ac complexes

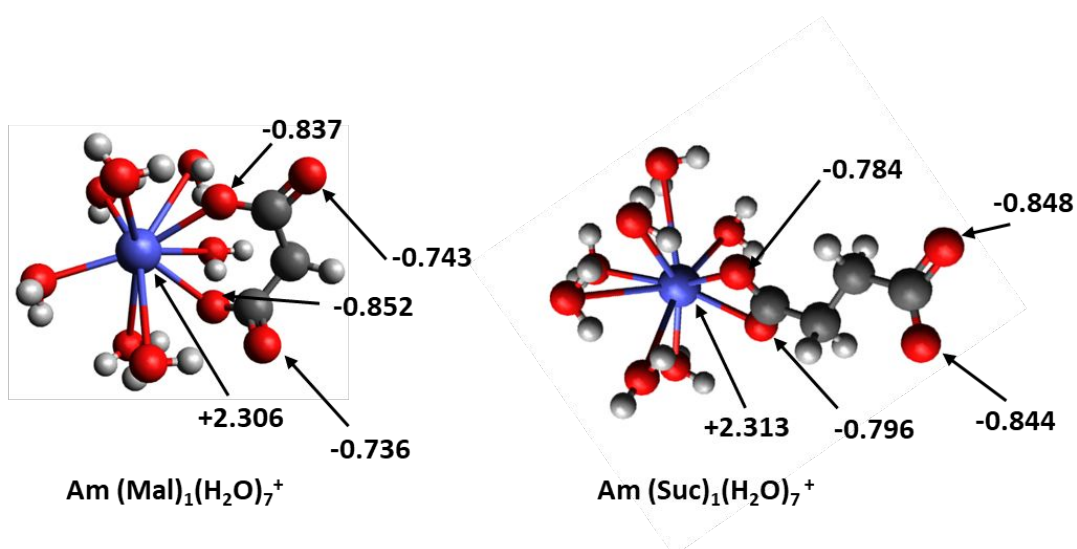

Figure S7. NPA charges of Am(Mal)<sup>+</sup> and Am(Suc)<sup>+</sup> estimated by DFT calculations

## REFERENCES

1. Smith, R. M., *NIST Critically selected stability constants of metal complexes database version 5.0*. . Nation institute of standards and technology, US secretary of commerce: Gaithersburg, 1988.
2. Gane, R.; Ingold, C. K., CCXCIV.—Electrometric titration curves of dibasic acids. Part IV. Corrections for interionic effects and for solvent electrostriction. First and second dissociation constants of some n-paraffin  $\alpha\omega$ -dicarboxylic acids, alkyl- and dialkyl-malonic acids, s-di- and -tetra-alkylsuccinic acids,  $\beta$ -alkyl- and  $\beta\beta$ -dialkyl-glutaric acids, and cyclic 1 : 1-di-acetic acids. Remarks on the configurations and molecular dimensions of these acids in dilute aqueous solution. *J. Chem. Soc.* **1931**, (0), 2153-2169.
3. DeRobertis, A.; DeStefano, C.; Foti, C., Medium Effects on the Protonation of Carboxylic Acids at Different Temperatures. *J. Chem. & Eng. Data* **1999**, 44 (2), 262-270.
4. Hummel, W.; Anderegg, G.; Rao, L.; Puigdomenech, I.; Tochiyama, O., *Chemical thermodynamics Vol. 9: Chemical thermodynamics of compounds and complexes of U, Np, Pu, Am, Tc, Se, Ni and Zr with selected organic ligands*. Elsevier Amsterdam, The Netherlands, 2005.
5. Fröhlich, D. R.; Skerencak-Frech, A.; Panak, P. J., A spectroscopic study on the formation of Cm(III) acetate complexes at elevated temperatures. *Dalton Trans.* **2014**, 43 (10), 3958-3965.
6. Pettit, L.; Sukhno, I.; Buzko, V.; Gans, P.; Puigdomenech, I.; Wanner, H.; Polushin, A., A suite program 'Equilibria in Aqueous Solutions'
7. Carnall, W. T.; Wybourne, G. G., Electronic Energy Levels of the Lighter Actinides:  $U^{3+}$ ,  $Np^{3+}$ ,  $Pu^{3+}$ ,  $Am^{3+}$ , and  $Cm^{3+}$ . *J. Chem. Phys.* **1964**, 40, 3428-3433.
8. Carnall, W. T., A systematic analysis of the spectra of trivalent actinide chlorides in  $D_{3h}$  site symmetry. *J. Chem. Phys.* **1992**, 96, 8713-8726.
9. Thouvenot, P.; Hubert, S.; Moulin, C.; Decambox, P.; Mauchien, P., Americium Trace Determination in Aqueous and Solid Matrices by Time-Resolved Laser-Induced Fluorescence. *Radiochim. Acta* **1993**, 61 (1), 15-21.
